# Supplementary material for: Tracking the interdiffusion of polymers at a molecular level by1H dipolar filter solid-state NMR under fast magic angle spinning
Source: Royal Society of Chemistry journal article supplement (doi:10.1039/c0sm00379d), 2010-10-26
Supplement: c0sm00379d.pdf [file c0sm00379d.pdf]

**Supplementary information for the manuscript:**

**Tracking the interdiffusion of polymers at a molecular level by  $^1\text{H}$   
dipolar filter solid-state NMR under fast magic angle spinning**

Qiang Gu, Xiaoliang Wang, Pingchuan Sun, Dongshan Zhou and Gi Xue

**$^1\text{H}$  CRAMPS and  $^{13}\text{C}$  CP/MAS NMR spectra of PS and PPO**

$^1\text{H}$  CRAMPS and  $^{13}\text{C}$  CP/MAS NMR experiments were performed on a Varian Infinityplus-400 wide-bore (89 mm) NMR spectrometer at a proton frequency of 399.7 MHz using a 4 mm double-resonance HX CP/MAS NMR probe. The magic angle spinning (MAS) was automatically controlled at 9.8 kHz and 4.5 kHz within  $\pm 2$  Hz for CRAMPS and  $^{13}\text{C}$  CP/MAS experiments, respectively. Detailed information about the CRAMPS experiment could be found else where.<sup>1</sup>

The  $^1\text{H}$  CRAMPS and  $^{13}\text{C}$  CP/MAS NMR spectra were list in Fig. S1 and the corresponding peak assignments were listed in table S1.

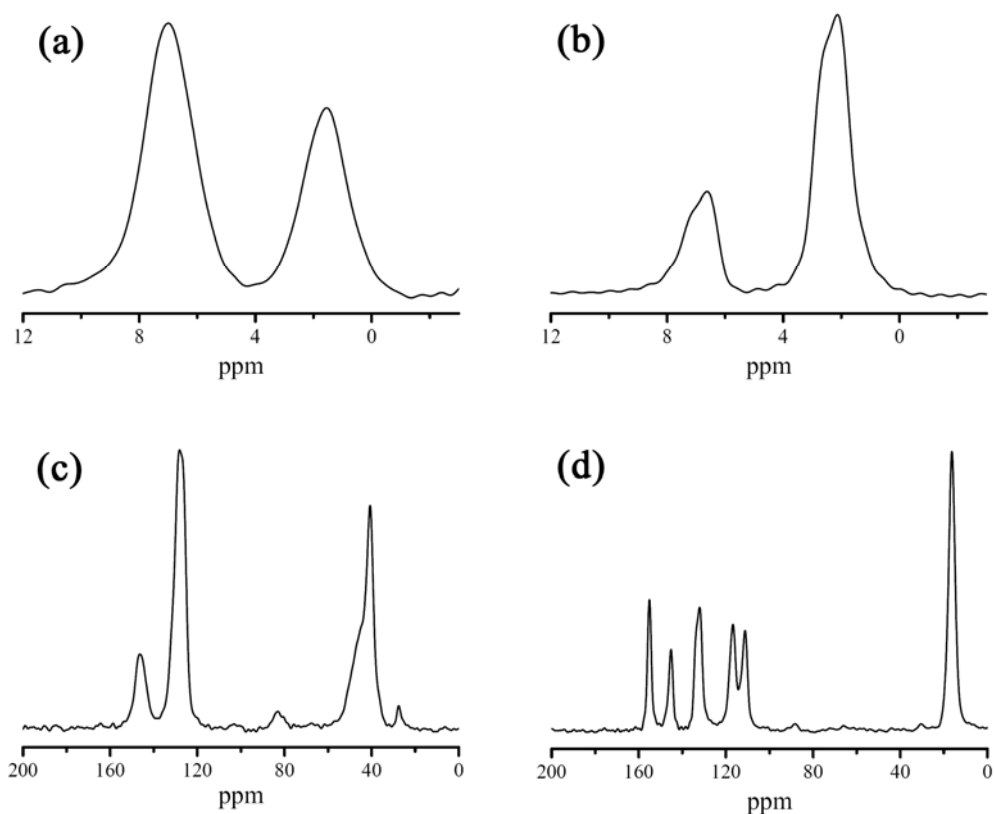

**Fig. S1** CRAMPS for (a) PS, (b) PPO and  $^1\text{H}$ - $^{13}\text{C}$  CP/MAS for (c) PS and (d) PPO, respectively. The MAS spinning frequency is 9.8 kHz for CRAMPS and 4.5 kHz for  $^1\text{H}$ - $^{13}\text{C}$  CP/MAS experiments, respectively.

**Table 1** Peak assignments for the  $^1\text{H}$  CRAMPS and  $^{13}\text{C}$  CP/MAS spectra of PS and PPO<sup>a</sup>

| spectra              | sample          | chemical shift (ppm) | structure          |
|----------------------|-----------------|----------------------|--------------------|
| $^1\text{H}$ peak    | PS              | 1.5                  | H7, H8             |
|                      |                 | 7.0                  | H2, H3, H4, H5, H6 |
|                      | PPO             | 2.1                  | H7, H8             |
|                      |                 | 6.6                  | H3, H5             |
| $^{13}\text{C}$ peak | PS <sup>b</sup> | 41.0                 | C7, C8             |
|                      |                 | 128                  | C2, C3, C4, C5, C6 |
|                      |                 | 146                  | C1                 |
|                      | PPO             | 17.0                 | C7, C8             |
|                      |                 | 112                  | C3                 |
|                      |                 | 117                  | C5                 |
|                      |                 | 133                  | C2                 |
|                      |                 | 146                  | C1                 |
| 156                  | C4              |                      |                    |

<sup>a</sup> Peak numbers refer to Figure S2. <sup>b</sup> Peaks at 27 ppm and 83 ppm originate from unknown impurities.

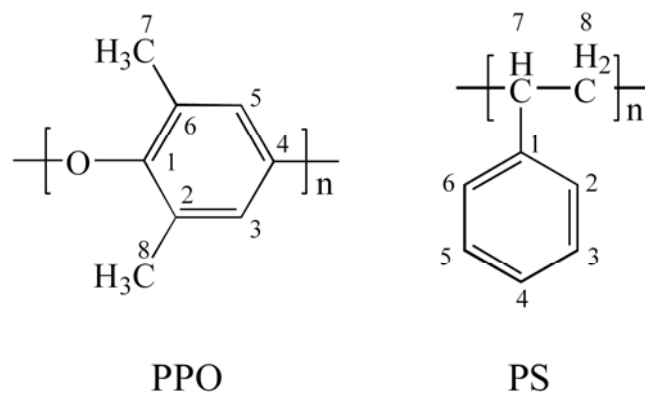

**Fig. S2** Chemical structure of PPO and PS.

1. B. Li, L. Xu, Q. Wu, T. Chen, P. Sun, Q. Jin, D. Ding, X. Wang, G. Xue and A. C. Shi, *Macromolecules*, 2007, **40**, 5776-5786.
